# Supplementary material
Source: PubMed Central journal article supplement (PMC4409163)
Supplement: ismej2014211x4.pdf [file ismej2014211x4.pdf]

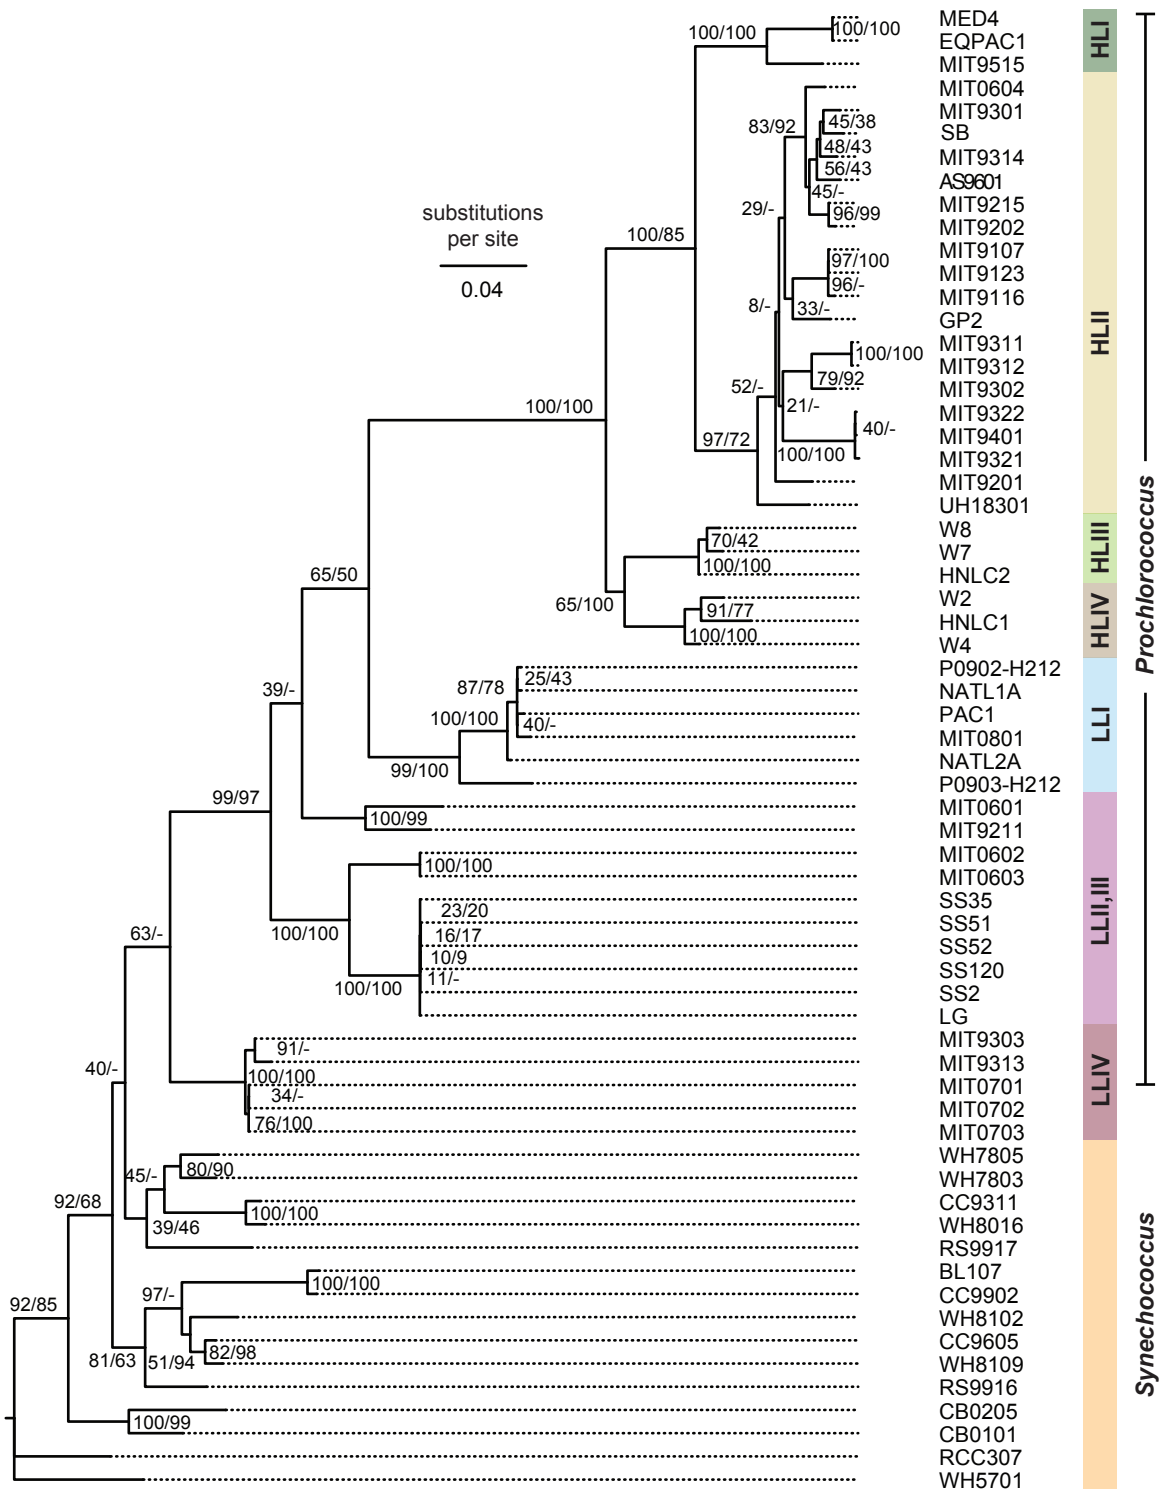

**Supplementary Figure S3.** Phylogeny of *Prochlorococcus* and *Synechococcus* GyrB proteins. Bootstrap values (total 100) were calculated using maximum likelihood (first value at each node) and neighbor joining (second value at each node), with dashes representing maximum likelihood topology unsupported by most of the neighbor joining trees.
