# Supplementary material
Source: PubMed Central journal article supplement (PMC4409163)
Supplement: ismej2014211x5.pdf [file ismej2014211x5.pdf]

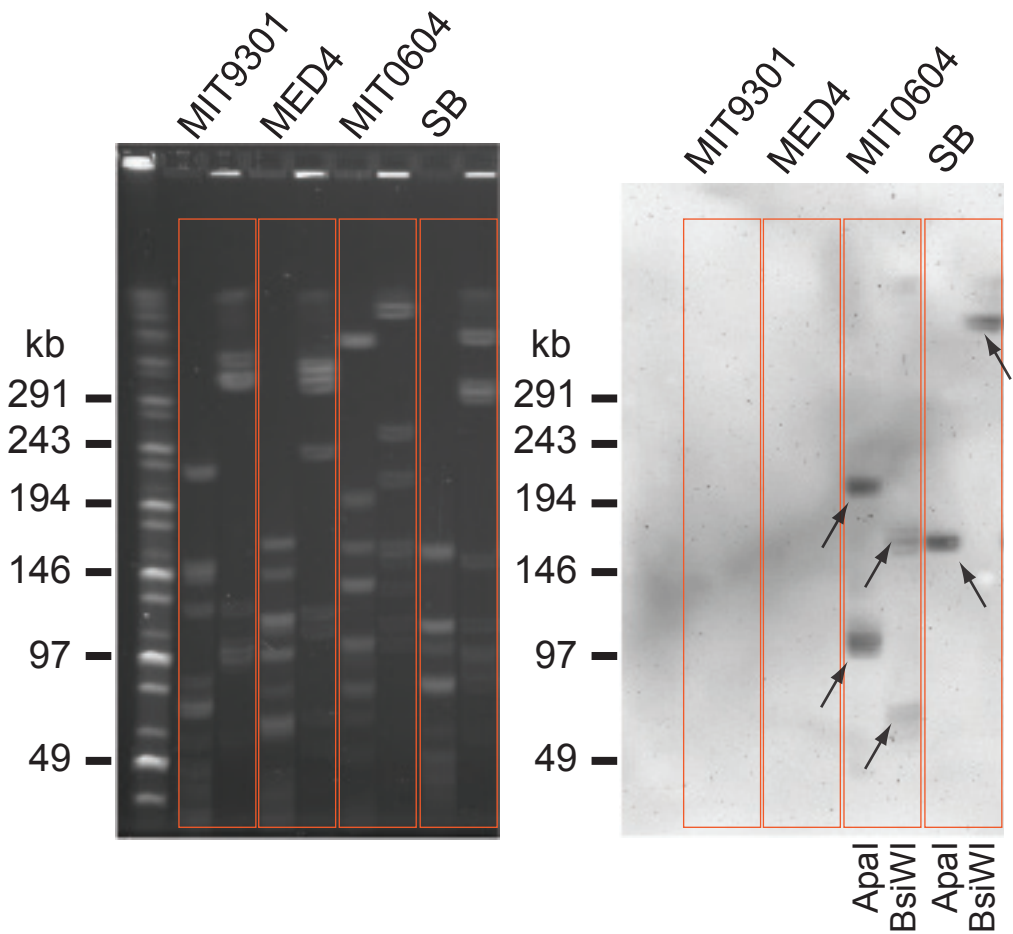

**Supplementary Figure S4.** Southern blot analysis confirms that *Prochlorococcus* MIT0604 contains two copies of *narB*. The ethidium bromide stained gel is shown at left and the southern blot is shown at right. The *narB* gene in MIT0604 is found on two restriction fragments of the expected sizes (100kb/197kb when digested with Apal and 62kb/155kb when digested with BsiWI). SB contains a single copy of *narB*. Arrows mark DNA fragments hybridizing to the *narB* probe.
