# Supplementary material
Source: PubMed Central journal article supplement (PMC4409163)
Supplement: ismej2014211x6.pdf [file ismej2014211x6.pdf]

### Nitrogen Genes

### Phosphorus Genes

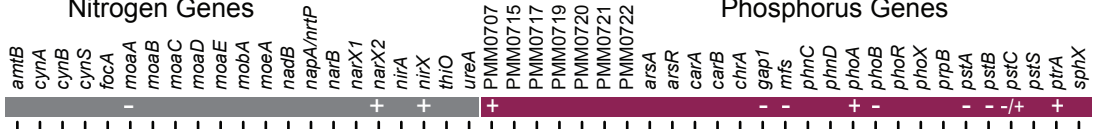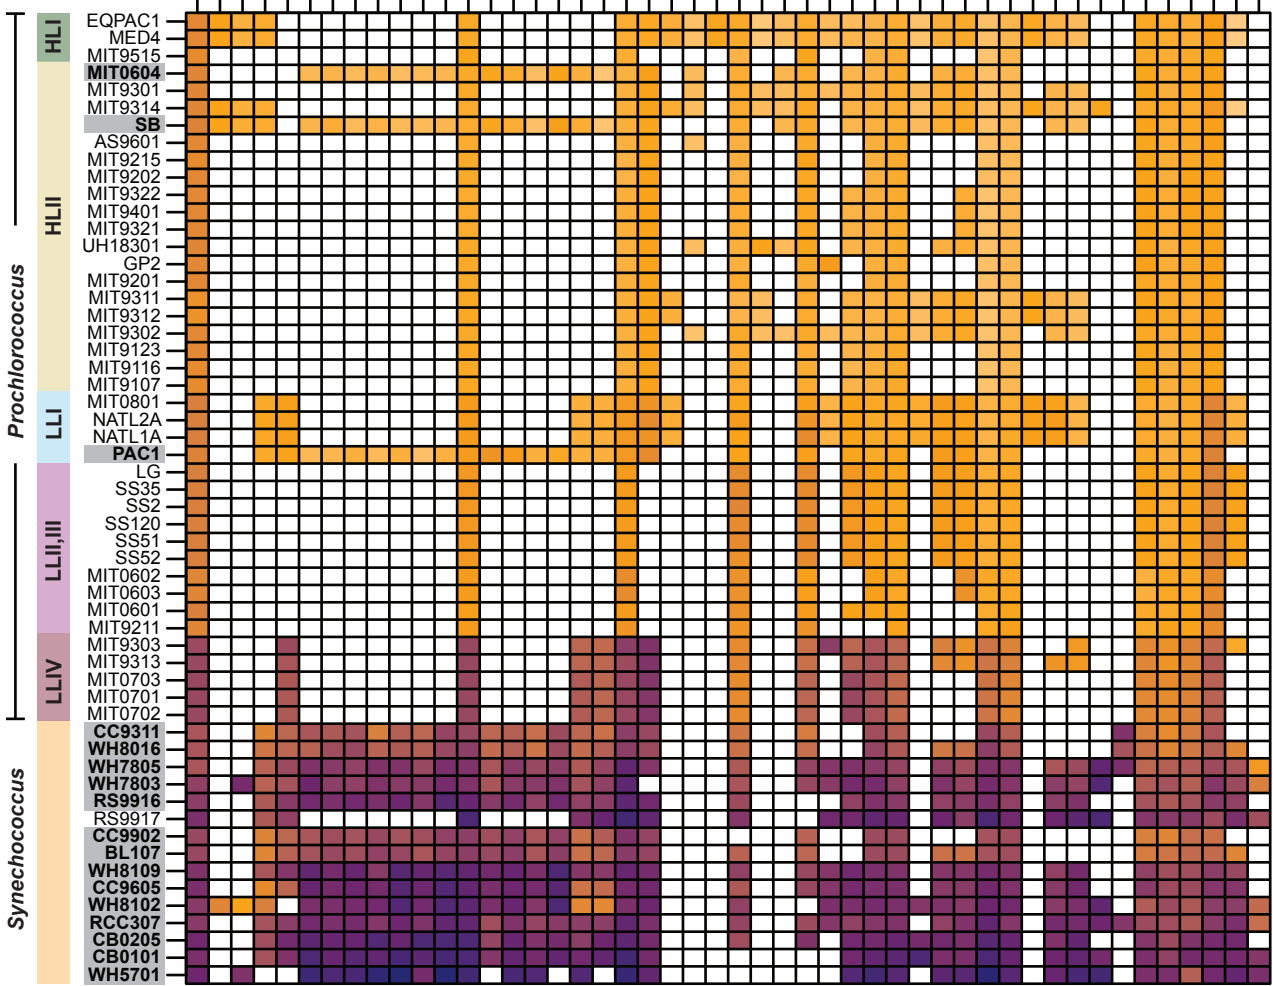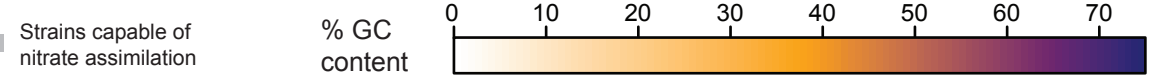

**Supplementary Figure S5.** Comparison of the distribution of nitrogen and phosphorus related genes within *Prochlorococcus* and *Synechococcus* genomes to explore the relationship between nitrogen and phosphorus acquisition traits within the streamlined genomes of *Prochlorococcus*. Genomes are ordered based on the phylogeny in Figure 2. Box color represents % GC content. The + or – above a gene cluster denotes whether it is composed of more than one cluster or if the cluster has been manually reduced. Gray strain labels denote if a strain has been found to assimilate nitrate from culture experiments.
