# Supplementary material
Source: PubMed Central journal article supplement (PMC4409163)
Supplement: ismej2014211x9.pdf [file ismej2014211x9.pdf]

Supplementary Table S1. Genes related to nitrogen and phosphorus assimilation examined in this study.

| Gene                  | ProPortal v4.0 COG  | Product                                                      | Role                                                 | Reference                                                    |
|-----------------------|---------------------|--------------------------------------------------------------|------------------------------------------------------|--------------------------------------------------------------|
| <i>Nitrogen Genes</i> |                     |                                                              |                                                      |                                                              |
| <i>amtB/amt1</i>      | 1478                | ammonium transporter protein                                 | ammonium transport                                   | García-Fernández et al., 2004                                |
| <i>cynA</i>           | 25277               | cyanate ABC type transporter substrate binding protein       | cyanate transport                                    | Kamennaya et al., 2008                                       |
| <i>cynB</i>           | 17453               | cyanate ABC type transporter permease protein                | cyanate transport                                    | Kamennaya et al., 2008                                       |
| <i>cynS</i>           | 16887               | cyanate lyase                                                | hydrolysis of cyanate to ammonium and carbon dioxide | Kamennaya et al., 2008                                       |
| <i>focA</i>           | 10584               | nitrite transporter from formate/nitrite family              | nitrite transport                                    | Rocap et al., 2003                                           |
| <i>moaA</i>           | 8269                | molybdenum cofactor biosynthesis protein A                   | molybdopterin biosynthesis                           | Martiny et al., 2009                                         |
| <i>moaB</i>           | 9123                | molybdenum cofactor biosynthesis protein B                   | molybdopterin biosynthesis                           | Martiny et al., 2009                                         |
| <i>moaC</i>           | 12914               | molybdenum cofactor biosynthesis protein C                   | molybdopterin biosynthesis                           | Martiny et al., 2009                                         |
| <i>moaD</i>           | 7626                | molybdenum cofactor biosynthesis protein D                   | molybdopterin biosynthesis                           | Martiny et al., 2009                                         |
| <i>moaE</i>           | 20838               | molybdenum cofactor biosynthesis protein E                   | molybdopterin biosynthesis                           | Martiny et al., 2009                                         |
| <i>mobA</i>           | 7553                | molybdopterin-guanine dinucleotide biosynthesis protein MobA | molybdopterin biosynthesis                           | Martiny et al., 2009                                         |
| <i>moeA</i>           | 6195                | molybdopterin biosynthesis protein MoeA                      | molybdopterin biosynthesis                           | Martiny et al., 2009                                         |
| <i>nadB</i>           | 253                 | L-aspartate oxidase                                          | deamination of amino acids                           | Tedeschi et al., 1996                                        |
| <i>napA/nrtP</i>      | 5121                | nitrate/nitrite transporter                                  | nitrate/nitrite transport                            | Martiny et al., 2009b; Wang et al., 2000; Bird & Wyman, 2003 |
| <i>narB</i>           | 3405                | assimilatory nitrate reductase                               | nitrate reduction to nitrite                         | Martiny et al., 2009                                         |
| <i>narX1</i>          | 12460               | conserved hypothetical protein                               | unknown function                                     | Martiny et al., 2009                                         |
| <i>narX2</i>          | 30465, 26956, 33277 | conserved hypothetical protein                               | unknown function                                     | Martiny et al., 2009                                         |
| <i>nirA</i>           | 5136                | ferredoxin nitrite reductase                                 | nitrite reduction to ammonium                        | Martiny et al., 2009                                         |
| <i>nirX</i>           | 27176, 11823        | conserved hypothetical protein                               | unknown function                                     | Martiny et al., 2009                                         |
| <i>thiO</i>           | 772                 | glycine oxidase                                              | deamination of amino acids                           | Nishiya & Imanaka, 1998                                      |
| <i>ureA</i>           | 1864                | urease subunit alpha                                         | hydrolysis of urea to ammonium and carbon dioxide    | Palinska et al., 2000                                        |

| Gene                    | ProPortal v4.0 COG | Product                                                    | Role                                           | Reference                                      |
|-------------------------|--------------------|------------------------------------------------------------|------------------------------------------------|------------------------------------------------|
| <i>Phosphorus Genes</i> |                    |                                                            |                                                |                                                |
| PMM0707                 | 30300, 31904       | hypothetical protein                                       | expressed in MED4 during phosphorus starvation | Martiny et al., 2006                           |
| PMM0715                 | 26328              | hypothetical protein                                       | expressed in MED4 during phosphorus starvation | Martiny et al., 2006                           |
| PMM0717                 | 32234              | hypothetical protein                                       | expressed in MED4 during phosphorus starvation | Martiny et al., 2006                           |
| PMM0719                 | 3650               | hypothetical protein                                       | expressed in MED4 during phosphorus starvation | Martiny et al., 2006                           |
| PMM0720                 | 28615              | hypothetical protein                                       | expressed in MED4 during phosphorus starvation | Martiny et al., 2006                           |
| PMM0721                 | 28631              | hypothetical protein                                       | expressed in MED4 during phosphorus starvation | Martiny et al., 2006                           |
| PMM0722                 | 2536               | hypothetical protein                                       | expressed in MED4 during phosphorus starvation | Martiny et al., 2006                           |
| <i>arsA</i>             | 22394              | arsenite efflux pump subunit                               | arsenate resistance                            | Martiny et al., 2006                           |
| <i>arsR</i>             | 1361               | arsenate reductase                                         | arsenate resistance                            | Martiny et al., 2006                           |
| <i>carA</i>             | 20                 | carbamoyl phosphate synthetase small subunit               | carbamoyl phosphate synthesis                  | Martiny et al., 2006                           |
| <i>carB</i>             | 346                | carbamoyl phosphate synthetase large subunit               | carbamoyl phosphate synthesis                  | Martiny et al., 2006                           |
| <i>chrA</i>             | 13381              | response regulator                                         | chromate resistance                            | Martiny et al., 2006                           |
| <i>gapI</i>             | 99                 | glyceraldehyde-3-phosphate dehydrogenase                   | expressed in MED4 during phosphorus starvation | Martiny et al., 2006                           |
| <i>mfs</i>              | 817                | major facilitator superfamily transporter                  | expressed in MED4 during phosphorus starvation | Martiny et al., 2006                           |
| <i>prpB</i>             | 6142               | phosphoenolpyruvate mutase                                 | phosphonate biosynthesis                       | Yu et al., 2013                                |
| <i>phnC</i>             | 506                | phosphonate ABC type transporter ATP binding protein       | phosphonate transport                          | Feingersch et al., 2012; Martinez et al., 2010 |
| <i>phnD</i>             | 4518               | phosphonate ABC type transporter substrate binding protein | phosphonate transport                          | Feingersch et al., 2012; Martinez et al., 2010 |
| <i>phoA</i>             | 15427, 26745       | alkaline phosphatase                                       | dephosphorylation                              | Martiny et al., 2006                           |
| <i>phoB</i>             | 204                | phosphate regulon response regulator                       | phosphate two component regulatory system      | Martiny et al., 2006                           |
| <i>phoR</i>             | 13582              | phosphate regulon sensor histidine kinase                  | phosphate two component regulatory system      | Martiny et al., 2006                           |
| <i>phoX</i>             | 26697              | alkaline phosphatase                                       | dephosphorylation                              | Martiny et al., 2006                           |
| <i>pstA</i>             | 3725               | phosphate ABC type transporter permease protein            | phosphate transport                            | Martiny et al., 2006                           |
| <i>pstB</i>             | 88                 | phosphate ABC type transporter ATP binding protein         | phosphate transport                            | Martiny et al., 2006                           |
| <i>pstC</i>             | 4183, 30634        | phosphate ABC type transporter permease protein            | phosphate transport                            | Martiny et al., 2006                           |
| <i>pstS</i>             | 1827               | phosphate ABC type transporter substrate binding protein   | phosphate transport                            | Martiny et al., 2006                           |
| <i>ptrA</i>             | 37989, 6860, 11384 | transcriptional regulator                                  | stress response to phosphorus starvation       | Ostrowski et al., 2010                         |
| <i>sphX</i>             | 25109              | phosphate binding protein                                  | phosphate transport                            | Mann & Scanlan, 1994                           |

## References for Supplementary Table S1:

- Bird C, Wyman M. (2003). Nitrate/nitrite assimilation system of the marine picoplanktonic cyanobacterium *Synechococcus* sp. strain WH 8103: effect of nitrogen source and availability on gene expression. *Appl Environ Microbiol* 69: 7009-7018.
- Feingersch R, Philosof A, Mejuch T, Glaser F, Alalouf O, Shoham Y, Béjà O. (2012). Potential for phosphite and phosphonate utilization by *Prochlorococcus*. *ISME J* 6: 827-834.
- García-Fernández JM, de Marsac NT, Diez J. (2004). Streamlined regulation and gene loss as adaptive mechanisms in *Prochlorococcus* for optimized nitrogen utilization in oligotrophic environments. *Microbiol Mol Biol Rev* 68: 630-638.
- Kamennaya NA, Chernihovsky M, Post AF. (2008). The cyanate utilization capacity of marine unicellular Cyanobacteria. *Limnol Oceanogr* 53: 2485-2494.
- Mann NH, Scanlan DJ. (1994). The SphX protein of *Synechococcus* species PCC 7942 belongs to a family of phosphate-binding proteins. *Mol Microbiol* 14: 595-596.
- Martinez A, Tyson GW, Delong EF. (2010). Widespread known and novel phosphonate utilization pathways in marine bacteria revealed by functional screening and metagenomic analyses. *Environ Microbiol* 12: 222-238.
- Martiny AC, Coleman ML, Chisholm SW. (2006). Phosphate acquisition genes in *Prochlorococcus* ecotypes: evidence for genome-wide adaptation. *Proc Natl Acad Sci USA* 103: 12552-12557.
- Martiny AC, Kathuria S, Berube PM. (2009). Widespread metabolic potential for nitrite and nitrate assimilation among *Prochlorococcus* ecotypes. *Proc Natl Acad Sci USA* 106: 10787-10792.
- Nishiya Y, Imanaka T. (1998). Purification and characterization of a novel glycine oxidase from *Bacillus subtilis*. *FEBS Lett* 438: 263-266.
- Ostrowski M, Mazard S, Tetu SG, Phillippy K, Johnson A, Palenik B, *et al.* (2010). PtrA is required for coordinate regulation of gene expression during phosphate stress in a marine *Synechococcus*. *ISME J* 4: 908-921.
- Palinska KA, Jahns T, Rippka R, de Marsac NT. (2000). *Prochlorococcus marinus* strain PCC 9511, a picoplanktonic cyanobacterium, synthesizes the smallest urease. *Microbiology* 146: 3099-3107.
- Rocap G, Larimer FW, Lamerdin J, Malfatti S, Chain P, Ahlgren NA, *et al.* (2003). Genome divergence in two *Prochlorococcus* ecotypes reflects oceanic niche differentiation. *Nature* 424: 1042-1047.
- Tedeschi G, Negri A, Mortarino M, Ceciliani F, Simonc T, Faotto L, Ronchi S. (1996). L-aspartate oxidase from *Escherichia coli*. II. Interaction with C4 dicarboxylic acids and identification of a novel L-aspartate: fumarate oxidoreductase activity. *Eur J Biochem* 239: 427-433.
- Wang Q, Li H, Post AF. (2000). Nitrate assimilation genes of the marine diazotrophic, filamentous cyanobacterium *Trichodesmium* sp. strain WH9601. *J Bacteriol* 182: 1764-1767.
- Yu X, Doroghazi JR, Janga SC, Zhang JK, Circello B, Griffin BM, *et al.* (2013). Diversity and abundance of phosphonate biosynthetic genes in nature. *Proc Natl Acad Sci USA* 110: 20759-20764.
